**TITLE:** BETA ADRENERGIC SENSITIVITY IN THE LUNG PERIPHERY OF BASENJI-GREYHOUND (BG) AND MONGREL DOGS

**AUTHORS:** K.S. Lindeman, M.D., A.N. Freed, Ph.D., C.A. Hirshman, M.D.

**AFFILIATION:** Depts. of Anes./CCM and Env. Health Sci., Johns Hopkins Med. Insts. Baltimore, MD 21205

**Introduction.** A beta adrenergic agonist is the most effective therapy for intraoperative bronchospasm. However, *in vitro* studies demonstrate impaired relaxation in response to beta adrenergic agonists in smooth muscle from asthmatic subjects. We questioned whether this beta deficit was important *in vivo*, and whether this was reflected in the very small peripheral airways. Thus, we studied the ability of albuterol to attenuate calcium chelator- and acetylcholine (Ach)-induced bronchoconstriction in the lung periphery of mongrel dogs and BG dogs, which have nonspecific airway hyperresponsiveness.

**Methods.** A wedged bronchoscope technique was used to measure collateral system resistance (Rcs) before and after aerosol challenges with a calcium chelator (Na<sub>2</sub>EDTA) and Ach. In dogs anesthetized with thiopental and fentanyl, baseline Rcs was measured. A one min challenge with either 4% Na<sub>2</sub>EDTA or Ach (10 mcg/ml) was performed, and Rcs was measured postchallenge. When Rcs returned to baseline, albuterol (1

mcg/kg IV) was administered, and second consecutive identical challenge was performed. Data were analyzed using Wilcoxon rank-sum test. We used  $p < 0.05$  to indicate significance.

**Results.** Initial responses to Na<sub>2</sub>EDTA and Ach were similar in magnitude between the two groups of dogs. Albuterol attenuated Na<sub>2</sub>EDTA-induced bronchoconstriction by  $61 \pm 6$  (mean  $\pm$  SE)% ( $p < 0.01$ ) in mongrel dogs and by  $70 \pm 15$ % ( $p < 0.01$ ) in BG dogs. Albuterol attenuated Ach-induced constriction by  $43 \pm 10$ % ( $p < 0.01$ ) in mongrel dogs (Fig. 1), but did not significantly ( $p = 0.75$ ) alter responses to Ach in BG dogs (Fig. 2).

**Discussion.** We concluded that an impairment in beta adrenergic-cholinergic interaction exists within small airways of BG dogs, *in vivo*, which may be very important in the pathogenesis of asthma. Finally, larger doses of beta agonists may be required to treat the reflex-induced (cholinergic) bronchospasm in asthmatic subjects during anesthesia.

Supported in part by HL39406, HL38435, SCOR HL37119 and a W.M. Keck Foundation grant.

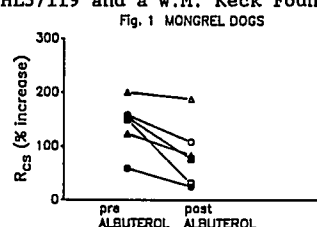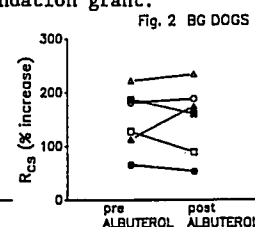

Source: https://asa2.silverchair.com/anesthesiology/article-pdf/73/3A/NA/666339/0000542-199009001-01198.pdf
